# Supplementary material
Source: PubMed Central journal article supplement (PMC10526639)
Supplement: NIHMS1907452-supplement-Supplemental_Data_File.pdf [file NIHMS1907452-supplement-Supplemental_Data_File.pdf]

# The Histone Methyltransferase Setdb2 Modulates TIMP-MMP Activity During Abdominal Aortic Aneurysm Development

## Authors

Frank M. Davis, M.D.<sup>1</sup>; William J. Melvin, M.D.<sup>1</sup>; Kevin Mangum, M.D.<sup>1</sup>; Lam C. Tsoi, Ph.D.<sup>2,3,4</sup>; Rachael Wasikowski, MS<sup>2</sup>; Amrita D. Joshi<sup>1</sup>, Ph.D.<sup>1</sup>; Qing Cai, MS<sup>1</sup>; Peter K. Henke, M.D.<sup>1</sup>; Johann E. Gudjonsson, M.D., Ph.D.<sup>2</sup>; Katherine A. Gallagher, M.D.<sup>1,5</sup>

## Affiliations

<sup>1</sup>Section of Vascular Surgery, Department of Surgery, University of Michigan, Ann Arbor, MI

<sup>2</sup>Department of Dermatology, University of Michigan, Ann Arbor, MI

<sup>3</sup>Department of Computation Medicine and Bioinformatics, University of Michigan, Ann Arbor, MI

<sup>4</sup>Department of Biostatistics, University of Michigan, Ann Arbor, MI

<sup>5</sup>Department of Pathology, University of Michigan, Ann Arbor, MI

<sup>6</sup>Department Microbiology and Immunology, University of Michigan, Ann Arbor, MI

# Supplemental Materials

-Online Figures 1-3

-Online Tables I-III

# Supplemental Figure 1

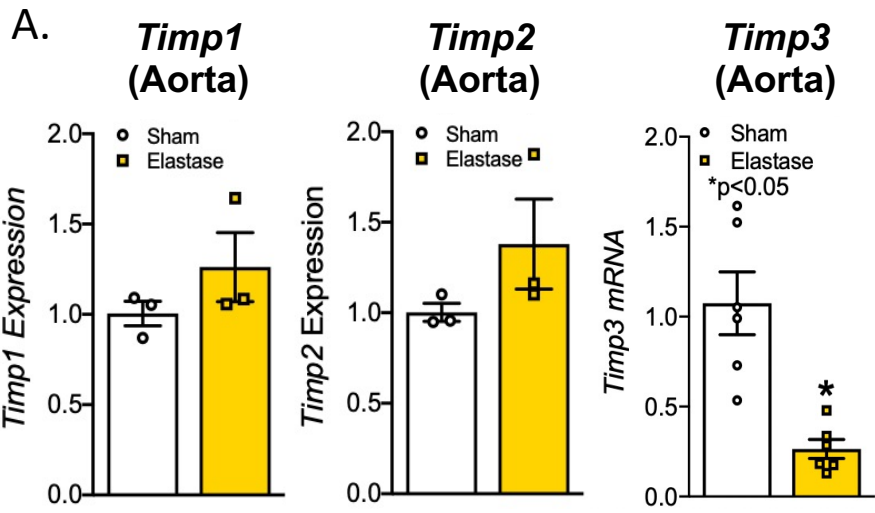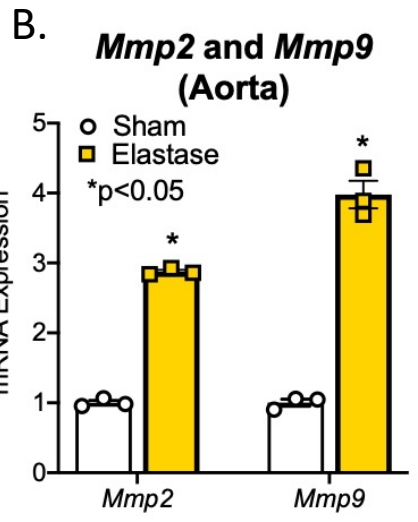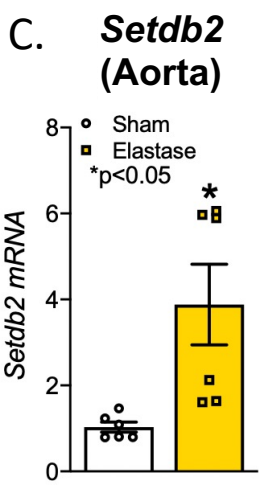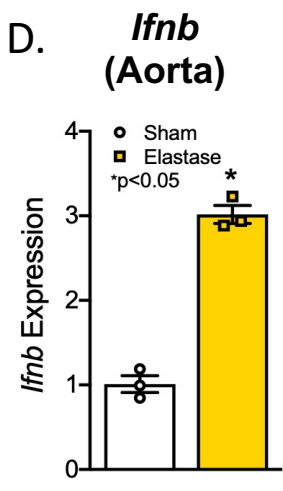

# Supplemental Figure 2

## A. Ascending Aortic Diameter

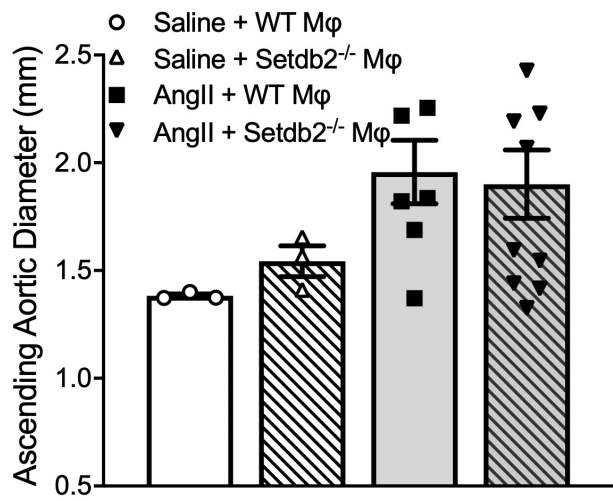

# Supplemental Figure 3

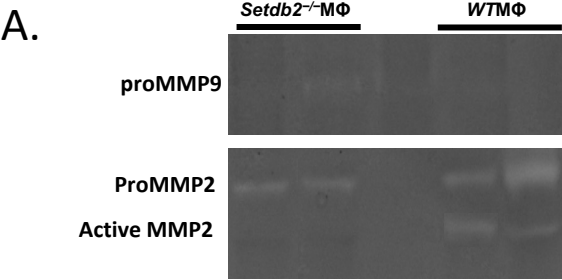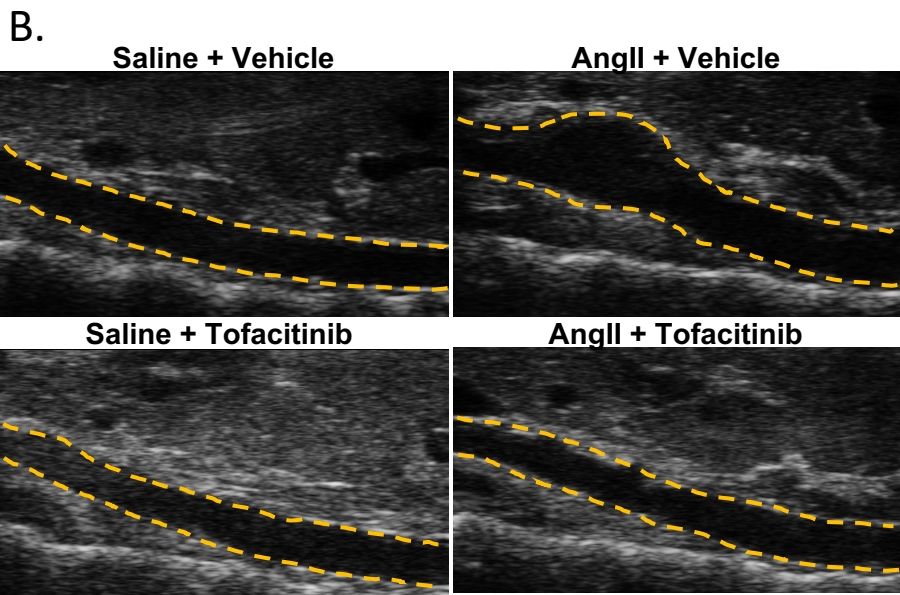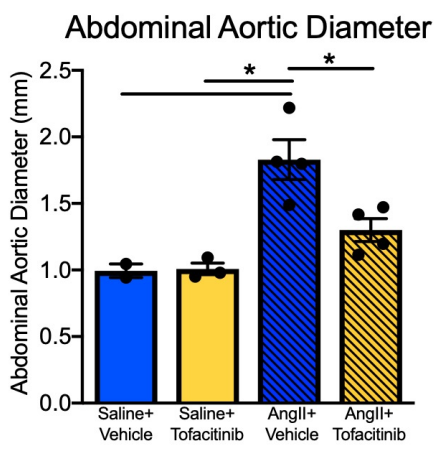

**Supplemental Table I Primer Sequences**

| <b>Gene</b>         | <b>Forward Primer</b>      | <b>Reverse Primer</b>      |
|---------------------|----------------------------|----------------------------|
| <b><i>Timp1</i></b> | 5' TCCCTTATTCACCAACTGCC 3' | 5' AGGGAGATTTGGGACCTCTT 3' |
| <b><i>Timp2</i></b> | 5' ATCCTCGGAGCGCAATAAAA 3' | 5' TGCCTTCTATGGCTGTGTTT 3' |
| <b><i>Timp3</i></b> | 5' TCATACTAGCACAATCGCCC 3' | 5' GGTAATTGCCATTGGGGGTA 3' |

**Supplemental Table II Human AAA and Atherosclerotic Tissue Cohort**

| <b>Demographic</b>            | <b>Control<br/>(n=3)</b> | <b>AAA<br/>(n=19)</b> |
|-------------------------------|--------------------------|-----------------------|
| Gender (% male)               | 2 (66.7)                 | 15 (78.9)             |
| Age (SD)                      | 67.7 (7.5)               | 66.4 (7.3)            |
| BMI (SD)                      | 29.0 (6.3)               | 27.1 (4.9)            |
| Aortic Diameter (SD, mm)      | ---                      | 53.7 (12.8)           |
| Tobacco abuse (prior/current) | 2 (66.7)                 | 17 (88.8)             |
| Hypertension                  | 2 (66.7)                 | 17 (77.7)             |
| Hyperlipidemia                | 2 (66.7)                 | 12 (63.2)             |
| Coronary artery disease       | 2 (66.7)                 | 6 (31.5)              |
| Diabetes                      | 0 (0)                    | 1 (5.2)               |
| COPD                          | 2 (66.7)                 | 4 (21.0)              |
| Renal Failure                 | 0 (0)                    | 1 (5.2)               |

BMI, body mass index; COPD, chronic obstructive pulmonary disease; SD, standard deviation

Continuous variable are summarized by mean (standard deviation) and categorical variables are summarized by N (%).

**Supplemental Table III Human AAA and Atherosclerotic Single Cell RNA-Sequencing Cohort**

| <b>Demographic</b>            | <b>Control<br/>(n=2)</b> | <b>AAA<br/>(n=4)</b> |
|-------------------------------|--------------------------|----------------------|
| Gender (% male)               | 2 (100)                  | 2 (50)               |
| Age (SD)                      | 59.8 (2.1)               | 67.2 (15.5)          |
| BMI (SD)                      | 33.7 (4.0)               | 33.7 (6.0)           |
| Aortic Diameter (SD, mm)      | ---                      | 59.7 (3.3)           |
| Tobacco abuse (prior/current) | 2 (100)                  | 2 (50.0)             |
| Hypertension                  | 2 (100)                  | 2 (50.0)             |
| Hyperlipidemia                | 2 (100)                  | 2 (50.0)             |
| Coronary artery disease       | 0 (0)                    | 0 (0)                |
| Diabetes                      | 0 (0)                    | 0 (0)                |
| COPD                          | 0 (0)                    | 1 (25.0)             |
| Renal Failure                 | 0 (0)                    | 0 (0)                |

BMI, body mass index; COPD, chronic obstructive pulmonary disease; SD, standard deviation

Continuous variable are summarized by mean (standard deviation) and categorical variables are summarized by N (%).
